# Supplementary material for: The Biosynthetic Gene Cluster for Andrastin A in Penicillium roqueforti
Source: PubMed Central journal article supplement (PMC5418334; doi:10.3389/fmicb.2017.00813), 2017-05-05
Supplement: Data_Sheet_1.pdf [file Data_Sheet_1.pdf]

Table S1. Name of each primer obtained, size of the insert ligated in each plasmid, and sequences of the primers used to amplify each insert.

| Plasmid       | Size of the insert (bp) | Sequence of primers (5'--3') used in amplification of inserts* |
|---------------|-------------------------|----------------------------------------------------------------|
| pJL-RNAi-adrA | 382                     | Fw: AGACTCCCATGGTTTGCCGTAATCCCGACT                             |
|               |                         | Rv: AGACTCCCATGGCGTCCACAAAGATCAAGG                             |
| pJL-RNAi-adrC | 412                     | Fw: AGACTCCCATGGACCAGCTAGAACTTACTC                             |
|               |                         | Rv: AGACTCCCATGGTCGATTAGAGCAGTGGAT                             |
| pJL-RNAi-adrD | 324                     | Fw: AGACTCCCATGGCACCAGATAACCGAAGCAG                            |
|               |                         | Rv: AGACTCCCATGGTTGTGCATCGCAGACGCT                             |
| pJL-RNAi-adrE | 287                     | Fw: AGACTCCCATGGCTTGGTTTGTGGATGTGG                             |
|               |                         | Rv: AGACTCCCATGGACCGCTCTCTAGGCTGAC                             |
| pJL-RNAi-adrF | 401                     | Fw: AGACTCCCATGGATCACCGGTAGCGCCTCT                             |
|               |                         | Rv: AGACTCCCATGGACCACTCGTAGCTGCCT                              |
| pJL-RNAi-adrG | 329                     | Fw: AGACTCCCATGGTTGCCTTATAATCACATT                             |
|               |                         | Rv: AGACTCCCATGGCCATCGCGAGGAATCCGG                             |
| pJL-RNAi-adrH | 325                     | Fw: AGACTCCCATGGGTAGTTCACGCAGATGCC                             |
|               |                         | Rv: AGACTCCCATGGTCCACTGCTGCTGAGGCC                             |
| pJL-RNAi-adrI | 374                     | Fw: AGACTCCCATGGATCATAGAGATGCCTTGG                             |
|               |                         | Rv: AGACTCCCATGGCCCAACCTCTCGCGCAA                              |
| pJL-RNAi-adrJ | 394                     | Fw: AGACTCCCATGGGCCCAACTATCTATACA                              |
|               |                         | Rv: AGACTCCCATGGCTCTTCTTTCCCGCGTGA                             |
| pJL-RNAi-adrK | 371                     | Fw: AGACTCCCATGGTCCTTGAGCTTGGCCTTG                             |
|               |                         | Rv: AGACTCCCATGGGTTGTGCGACTTTTAGCTT                            |

\* *NcoI* sites are highlighted in red.

Table S2. Primers used in qRT-PCR experiments

| Target gene | Name of primer | Sequence 5'---3'      | Amplicon size (pb) |
|-------------|----------------|-----------------------|--------------------|
| <i>adrA</i> | adrA-qPCR fw   | CGACTGGCTACGTCTCACTG  | 106                |
|             | adrA-qPCR rv   | TAAAAACCTAGCCGCGATTG  |                    |
| <i>adrC</i> | adrC-qPCR fw   | TGTGTCAGATCCTCGTTGAA  | 85                 |
|             | adrC-qPCR rv   | CTGCCGTAAACCGAAAAGTA  |                    |
| <i>adrD</i> | adrD-qPCR fw   | GGCTCGGACGACTATACTGA  | 84                 |
|             | adrD-qPCR rv   | AGTACAGAACGCCTGGAGTG  |                    |
| <i>adrE</i> | adrE-qPCR fw   | CTCGTATTCCAGCTGCTCCT  | 94                 |
|             | adrE-qPCR rv   | CCAAAAGTCTCACGAAGCAA  |                    |
| <i>adrF</i> | adrF-qPCR fw   | CCATGAGACGACACCAAGGC  | 112                |
|             | adrF-qPCR rv   | ATCAACGCTGGAATTCTGGT  |                    |
| <i>adrG</i> | adrG-qPCR fw   | GAGTCCATCGAGCTCCTGTC  | 98                 |
|             | adrG-qPCR rv   | ACGAAAAATGACAGGCCAAG  |                    |
| <i>adrH</i> | adrH-qPCR fw   | GACACCCAATATCGGACAAG  | 93                 |
|             | adrH-qPCR rv   | AAGGCATCTGCGTGA ACTAC |                    |
| <i>adrI</i> | adrI-qPCR fw   | ACGTCGCGAAAAGACAAGAT  | 97                 |
|             | adrI-qPCR rv   | TCGCGGTTGGGTAGATAAAG  |                    |
| <i>adrJ</i> | adrJ-qPCR fw   | TGCGTGGACTGCTCTACTTC  | 82                 |
|             | adrJ-qPCR rv   | GAGTTCTGTGAGCGGGTCTA  |                    |
| <i>adrK</i> | adrK-qPCR fw   | TGACCCAAAGAGCCTCTACA  | 88                 |
|             | adrK-qPCR rv   | CGCTGGAATCTTGCTGTATT  |                    |

**A**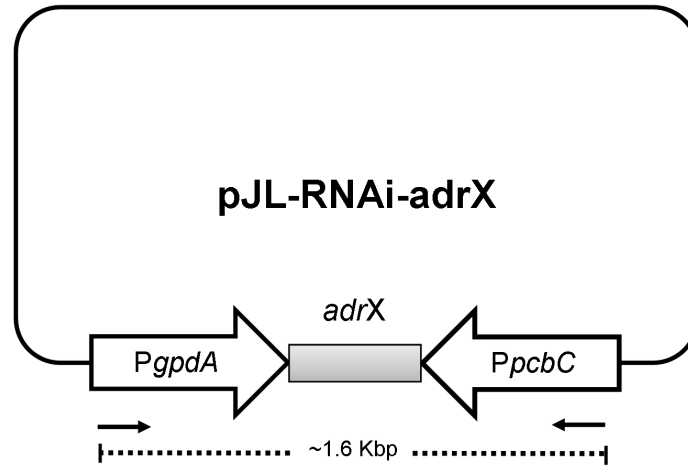**B**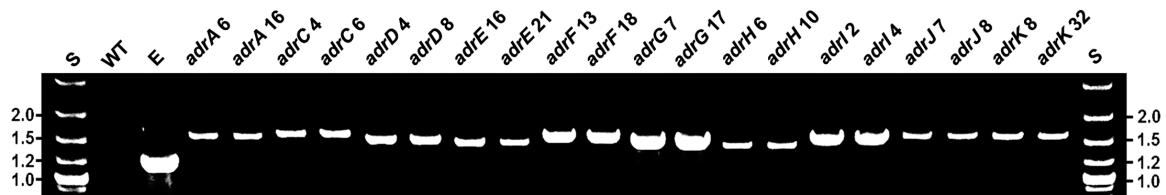

Figure S1. A) Example of the plasmid constructed for each gene from the *adr* cluster. *PgpdA*: promoter from the *gpd* gene from *A. nidulans*. *PpcbC*: promoter from the *pcbC* gene from *P. chrysogenum*. Both promoters are oriented in opposite directions, generating double-stranded RNA molecules (dsRNAs) from the DNA fragment inserted, and thus triggering the fungal RNA-silencing machinery. The grey box between the promoters represents a fragment from a given *adr* gene (*adrX*, where X identifies the specific gene; see Supplementary Table S1). The small black arrows represent primers ConfRNAiFW (5'-GCATGCCATTAACCTAGG-3') and ConfRNAiRV (5'-ACGGTGGCTGAAGATTC-3'). These primers were used to confirm the integration of the full silencing cassette (see panel B). The expected size of the amplicon containing the full silencing cassette (around 1.6 Kbp) is indicated. B) PCR assay demonstrating integration of the full silencing cassette in each transformant obtained. Amplicons obtained were subjected to electrophoresis in agarose gels. Lane WT: wild-type strain *P. roqueforti* CECT 2905; lane E: *P. roqueforti* CECT 2905 containing empty pJL43-RNAi vector; lane S: Standard GeneRuler 1 kb DNA Ladder (Fermentas). Relevant sizes expressed in kb are shown at left. Please note that as expected, length of amplicon obtained from *P. roqueforti* CECT 2905 containing empty vector is shorter (expected size 1.2 Kbp).
